# Supplementary material
Source: Copernicus journal article supplement (doi:10.5194/egusphere-2026-1499)
Supplement: Supplementary file 1 [file egusphere-2026-1499-supplement.pdf]

## **Do GEMS geostationary satellite observations of tropospheric NO<sub>2</sub> always improve NO<sub>x</sub> emission estimates and related air quality modelling?**

Fei Yao<sup>1,2,3</sup>, Paul I. Palmer<sup>2,3</sup>, Xiaolin Wang<sup>4</sup>, Yi Wang<sup>5</sup>, Gitaek T. Lee<sup>6</sup>, Haolin Wang<sup>3</sup>, Liang Feng<sup>2,3</sup>, Daven K. Henze<sup>7</sup>, and Rokjin J. Park<sup>6</sup>

<sup>1</sup>China-UK Low Carbon College, Shanghai Jiao Tong University, Shanghai 201306, China

<sup>2</sup>National Centre for Earth Observation, University of Edinburgh, Edinburgh EH9 3FF, United Kingdom

<sup>3</sup>School of GeoSciences, University of Edinburgh, Edinburgh EH9 3FF, United Kingdom

<sup>4</sup>School of Engineering and Applied Sciences, Harvard University, Cambridge, MA, USA

<sup>5</sup>Hubei Key Laboratory of Regional Ecology and Environmental Change, School of Geography and Information Engineering, China University of Geosciences, Wuhan 430074, China

<sup>6</sup>School of Earth and Environmental Science, Seoul National University, Seoul, Republic of Korea

<sup>7</sup>Department of Mechanical Engineering, University of Colorado, Boulder, CO 80309, USA

**Correspondence:** Fei Yao (fei.yao@sjtu.edu.cn) and Paul I. Palmer (paul.palmer@ed.ac.uk)

This PDF file includes Supporting Figures S1 to S14.

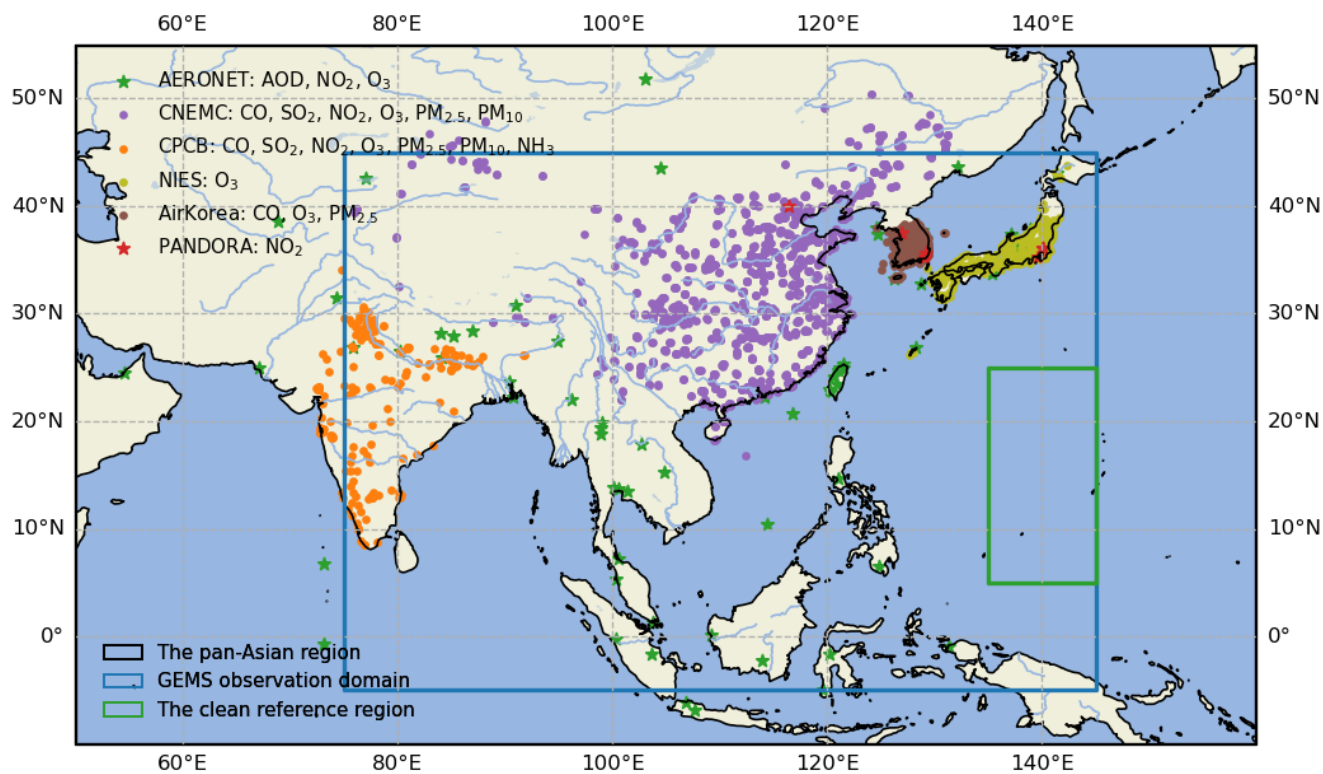

**Figure S1.** Geographical distributions of the multi-source *in situ* measurements used for independent model evaluation. Also shown are the pan-Asian region, GEMS observation domain, and clean reference region for defining the observation uncertainty of GEMS tropospheric NO<sub>2</sub> retrievals.

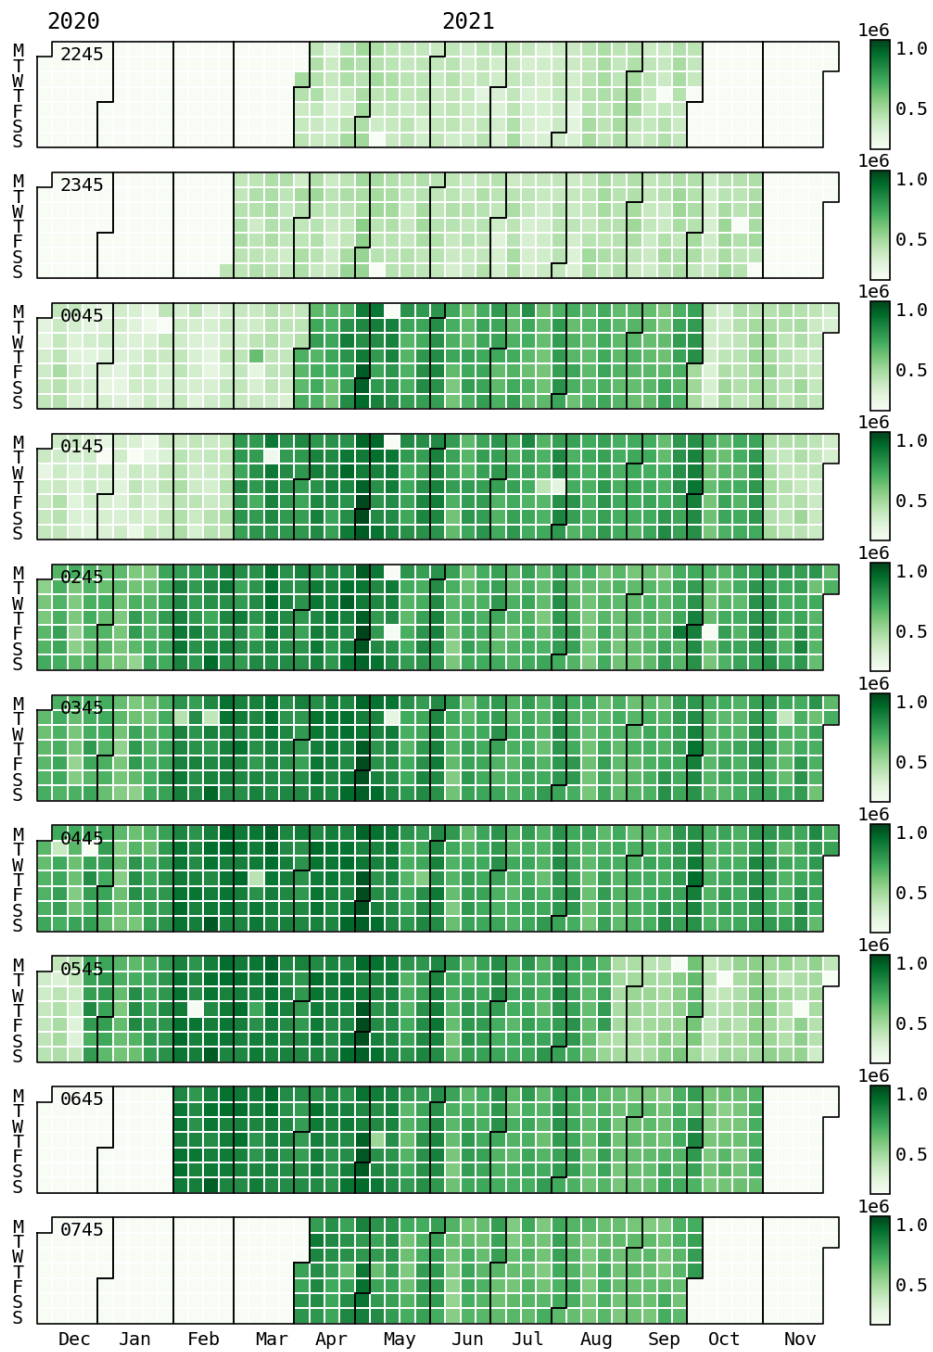

**Figure S2.** Hourly distributions of GEMS tropospheric NO<sub>2</sub> retrievals counts for all observations over the pan-Asian region.

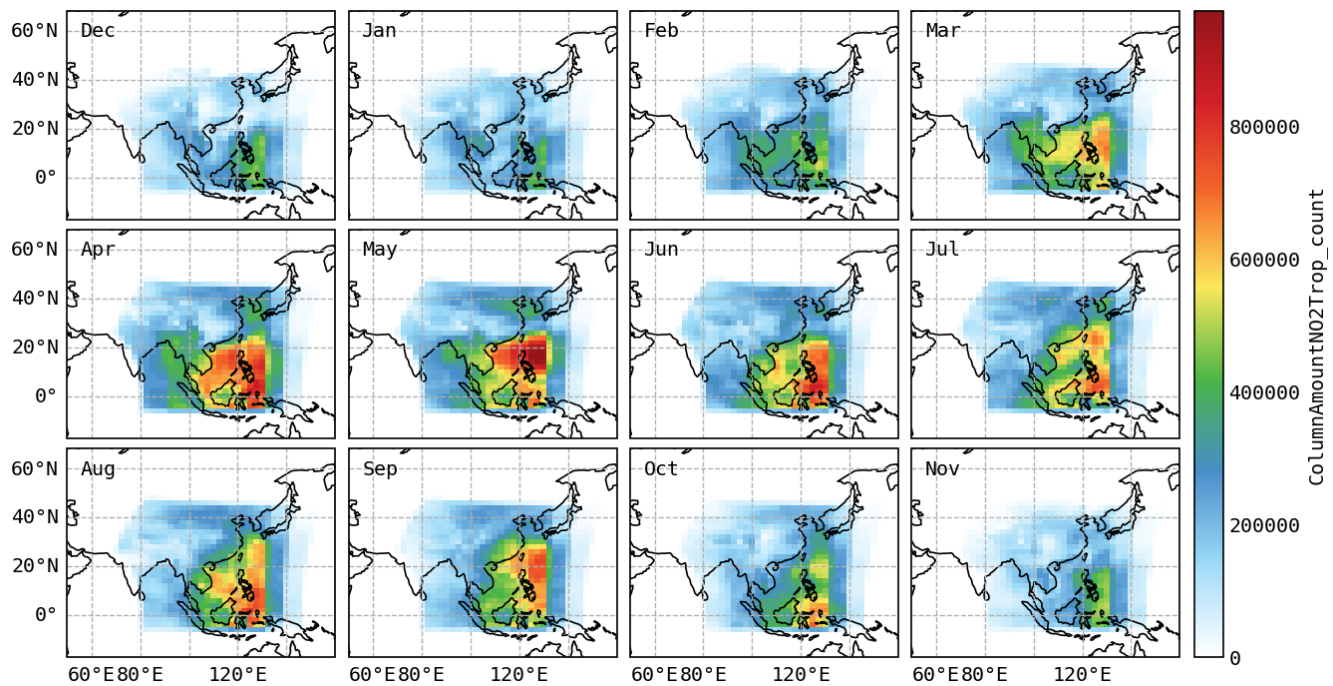

**Figure S3.** Geographical distributions of monthly counts of GEMS tropospheric NO<sub>2</sub> retrievals for all daytime observations.

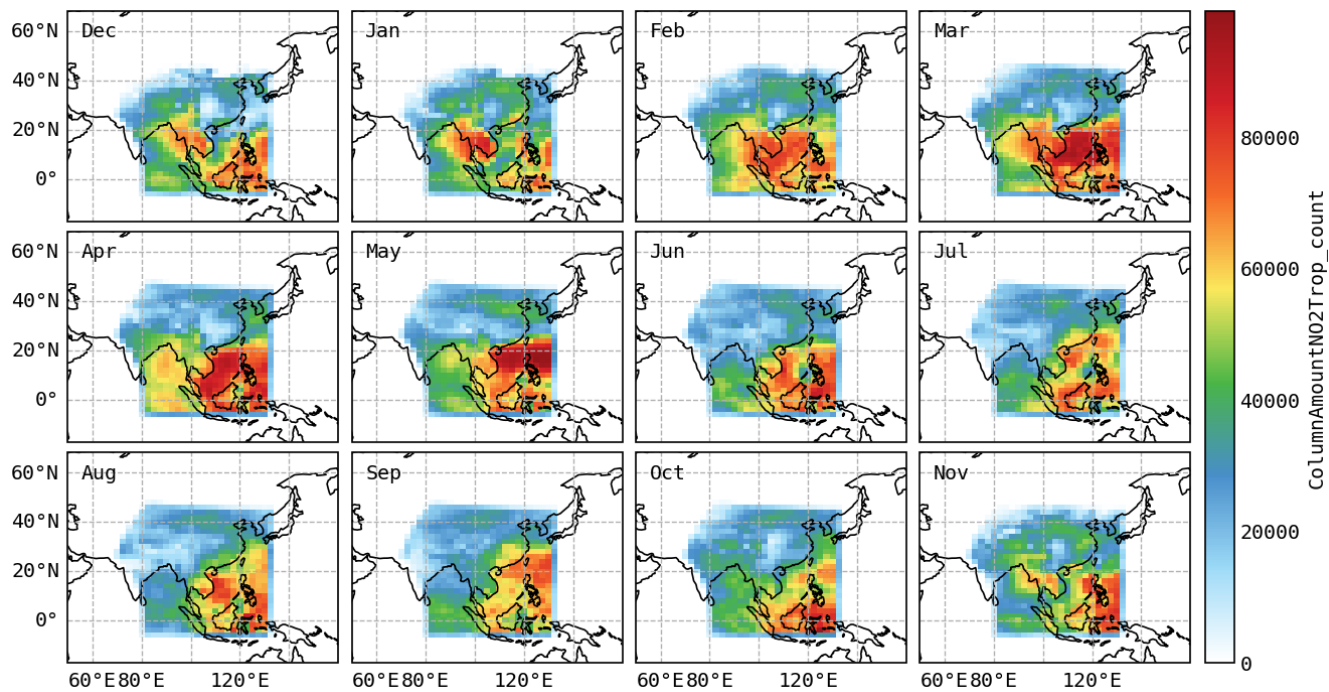

**Figure S4.** Geographical distributions of monthly counts of GEMS tropospheric NO<sub>2</sub> retrievals for observations at 13:45 local time (Korea Standard Time).

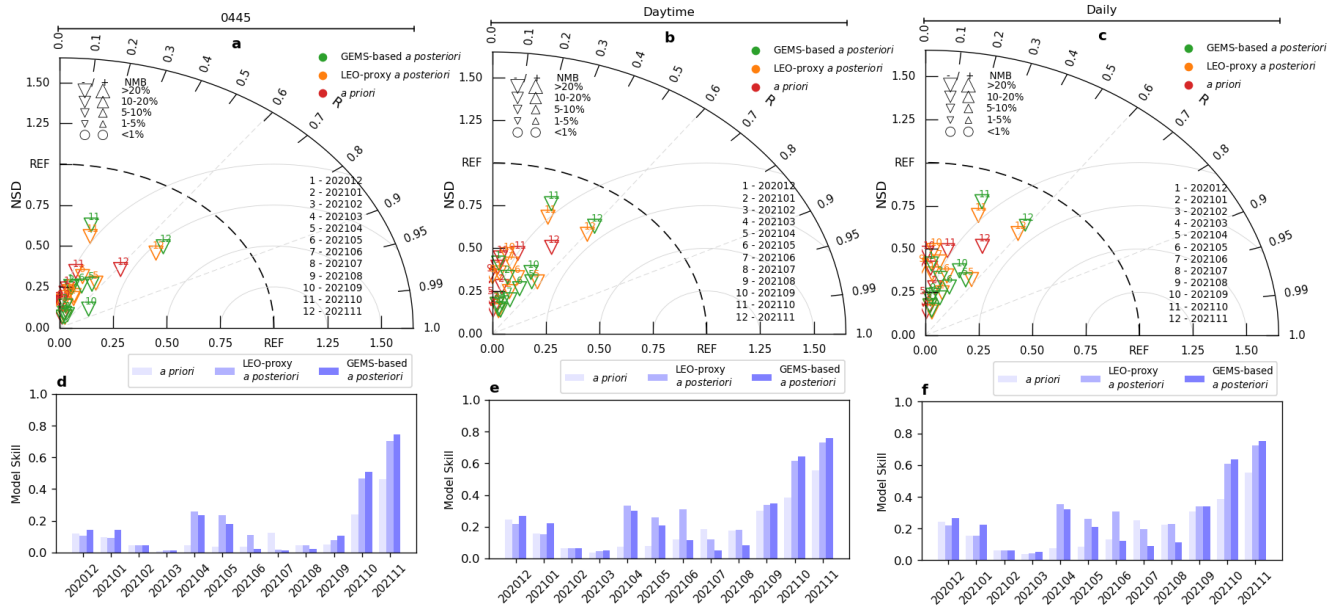

**Figure S5.** Same as Figure 3 but for columnar NO<sub>2</sub> measurements from the Pandonia Global Network (PGN).

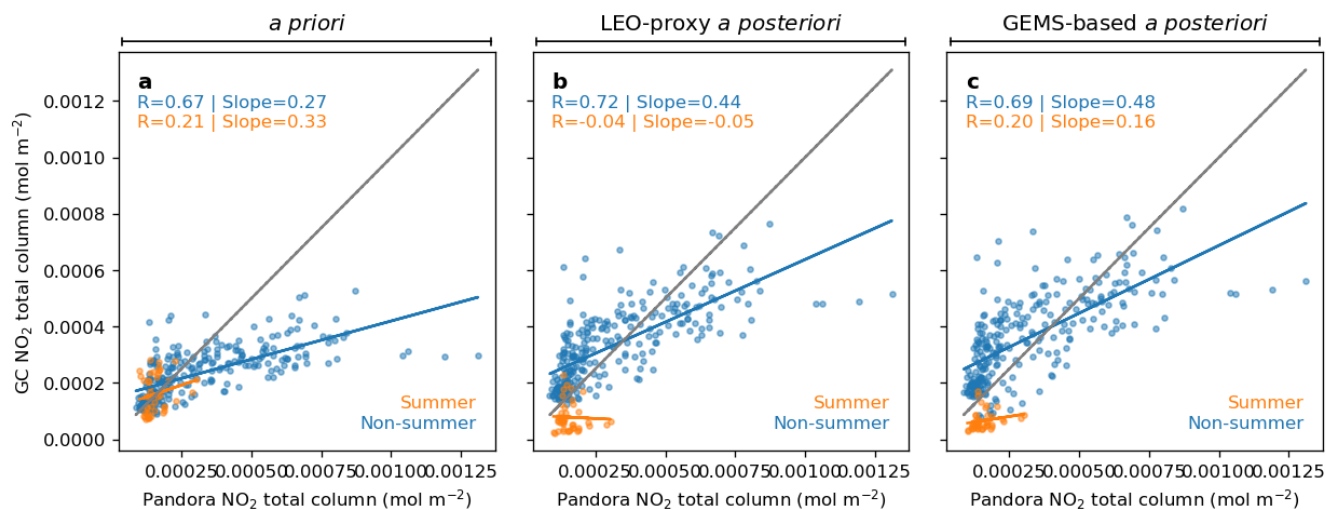

**Figure S6.** Scatter plots between modelled and observed columnar NO<sub>2</sub> from the Pandora Global Network (PGN) at the Beijing-RADI site. The modelled columnar NO<sub>2</sub> is driven by *a priori* (a) and *a posteriori* NO<sub>x</sub> emissions from both the "LEO-proxy" (b) and "GEMS-based" (c) inversions. The points distinguish between summer (orange) and non-summer (blue) months. The linear correlation coefficients (R) and linear regression slopes between the modelled and observed columnar NO<sub>2</sub> are also shown for each case.

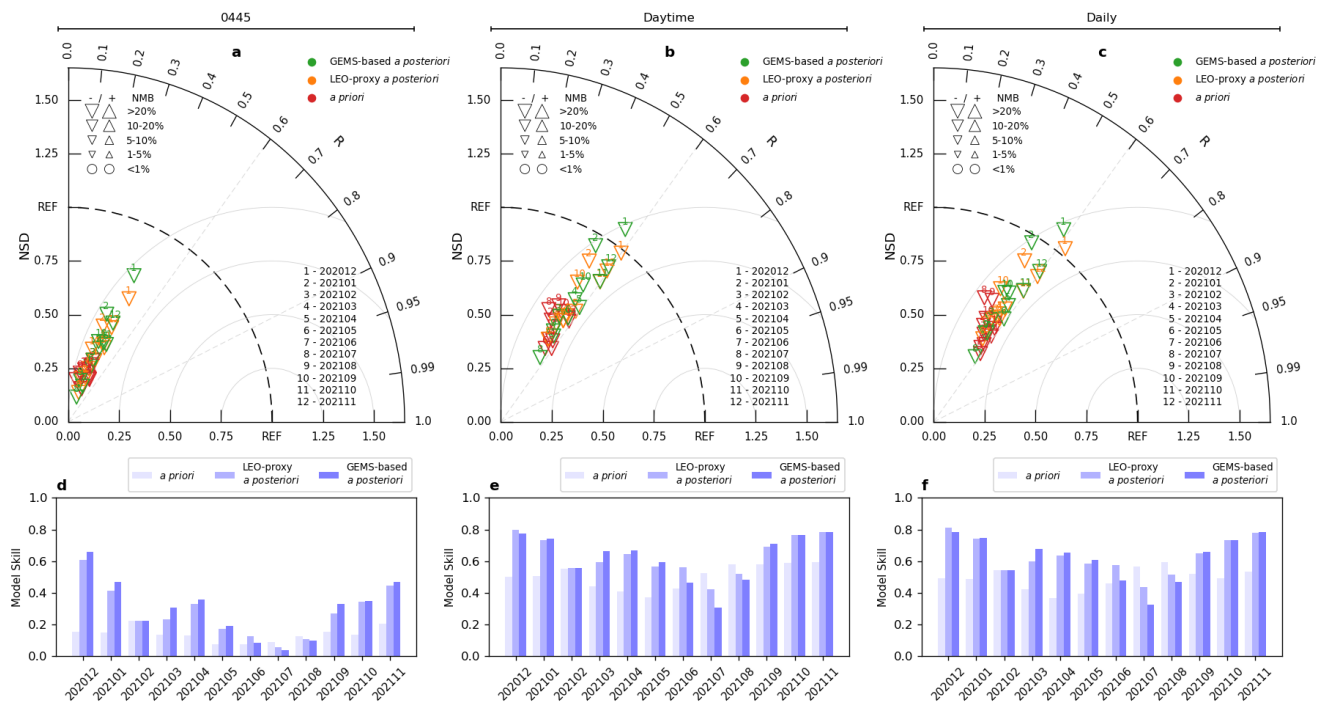

**Figure S7.** Same as Figure 3 but for surface NO<sub>2</sub> measurements from the China National Environmental Monitoring Centre (CNEMC).

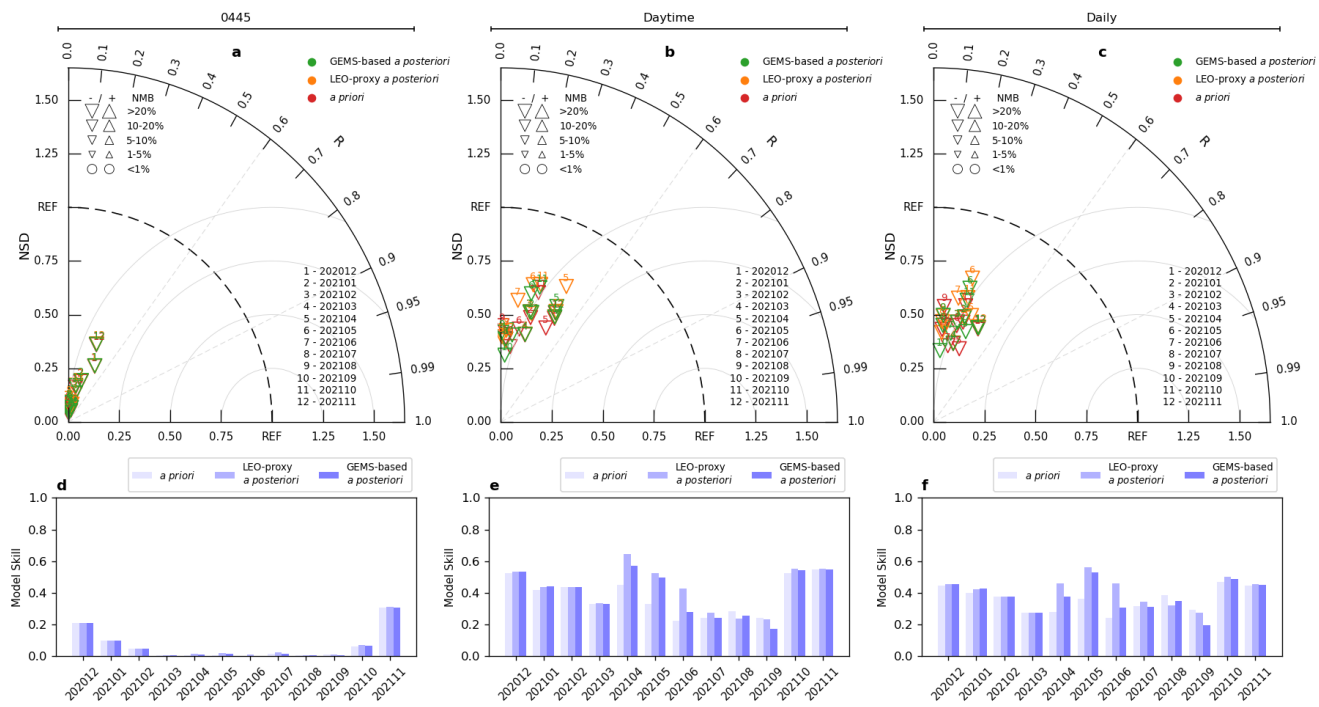

**Figure S8.** Same as Figure 3 but for surface NO<sub>2</sub> measurements from the Central Pollution Control Board (CPCB) of India.

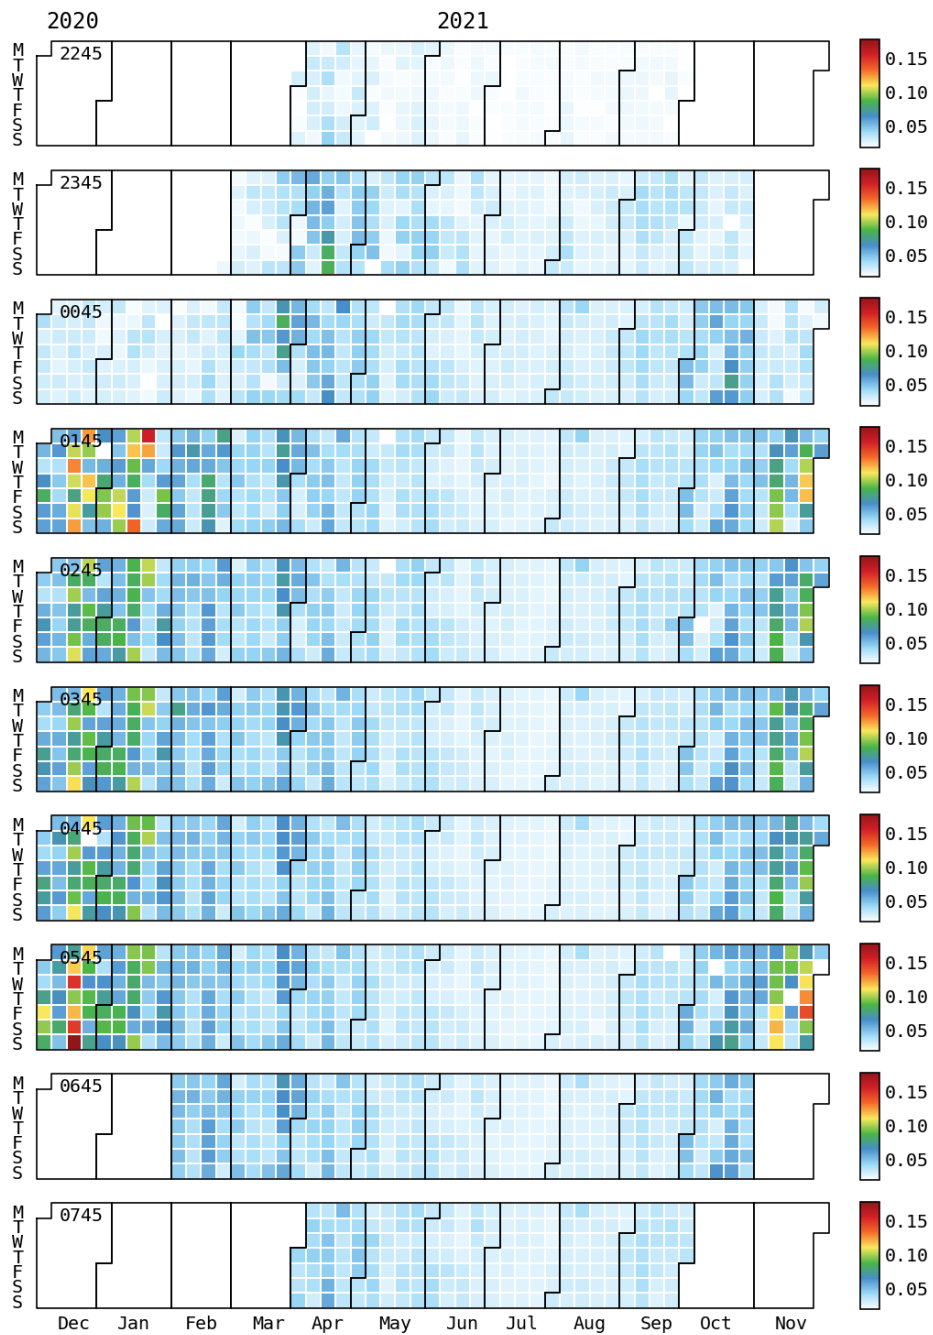

**Figure S9.** Hourly distributions of GEMS tropospheric NO<sub>2</sub> retrievals averages for all observations over the pan-Asian region.

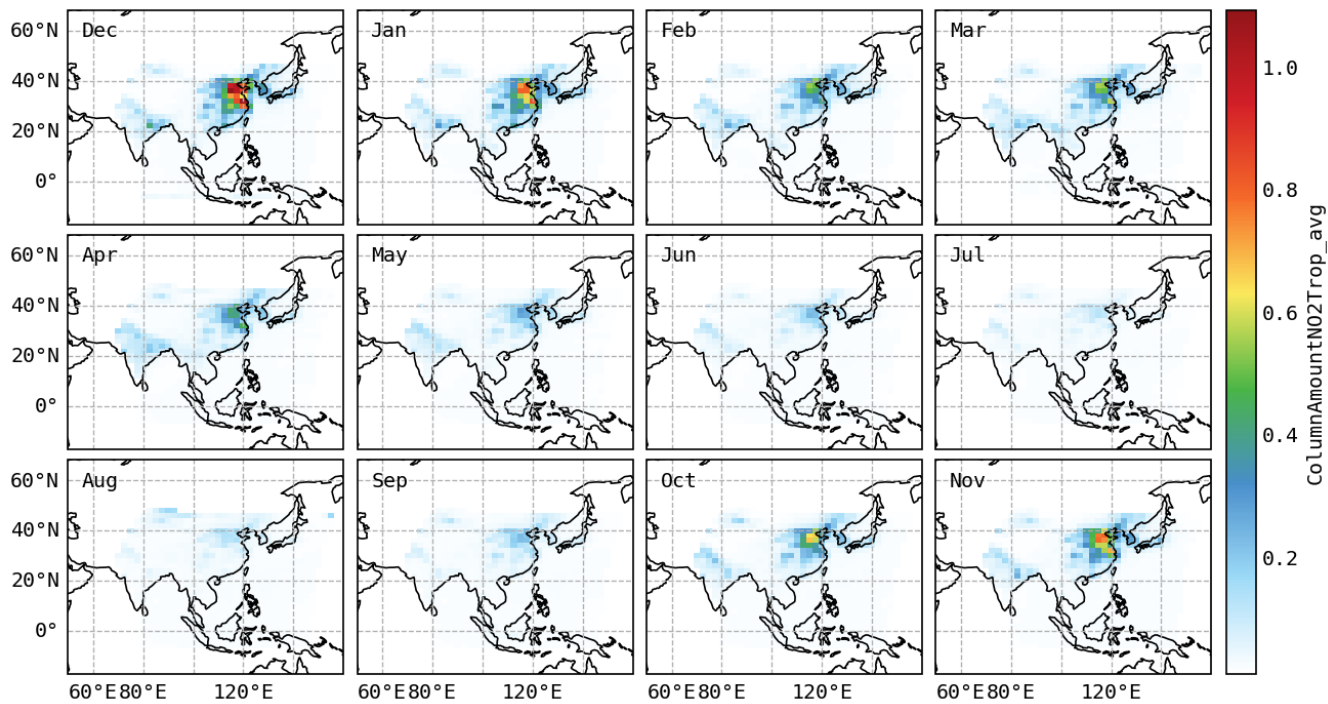

**Figure S10.** Geographical distributions of monthly averages of GEMS tropospheric NO<sub>2</sub> retrievals for all daytime observations.

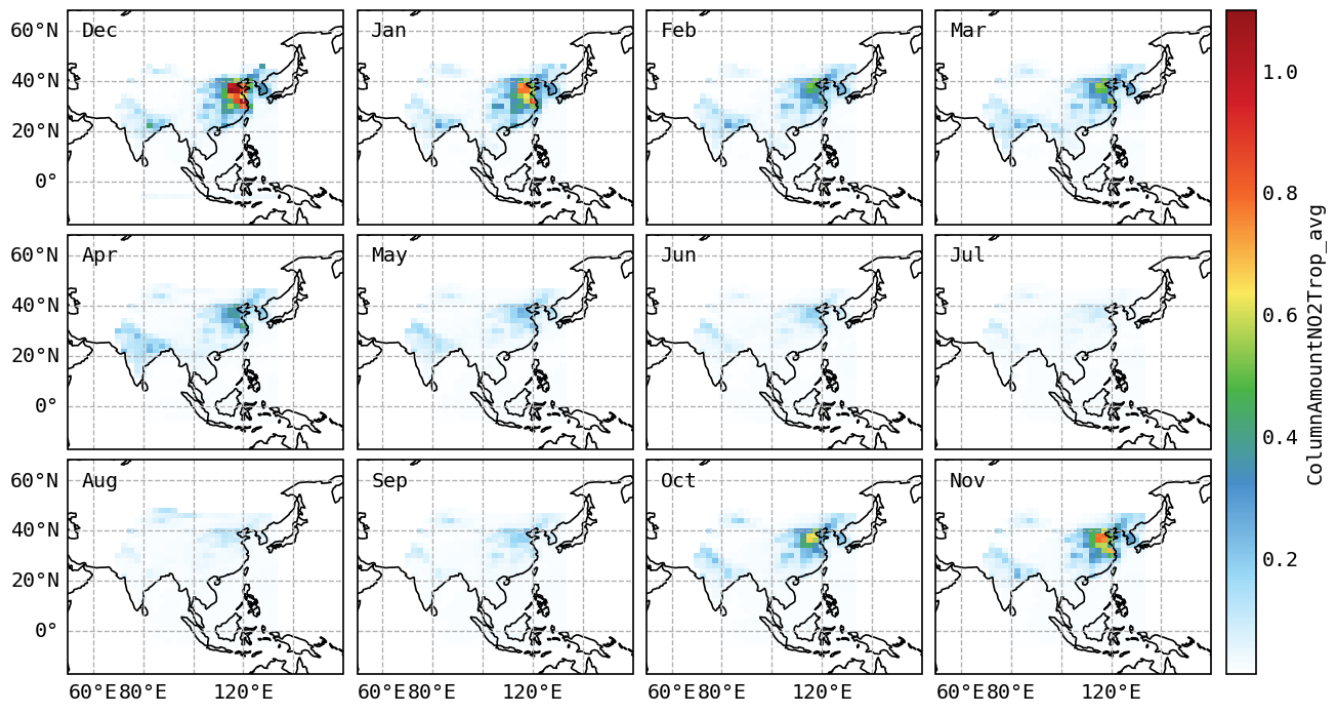

**Figure S11.** Geographical distributions of monthly averages of GEMS tropospheric NO<sub>2</sub> retrievals for observations at 13:45 local time (Korea Standard Time).

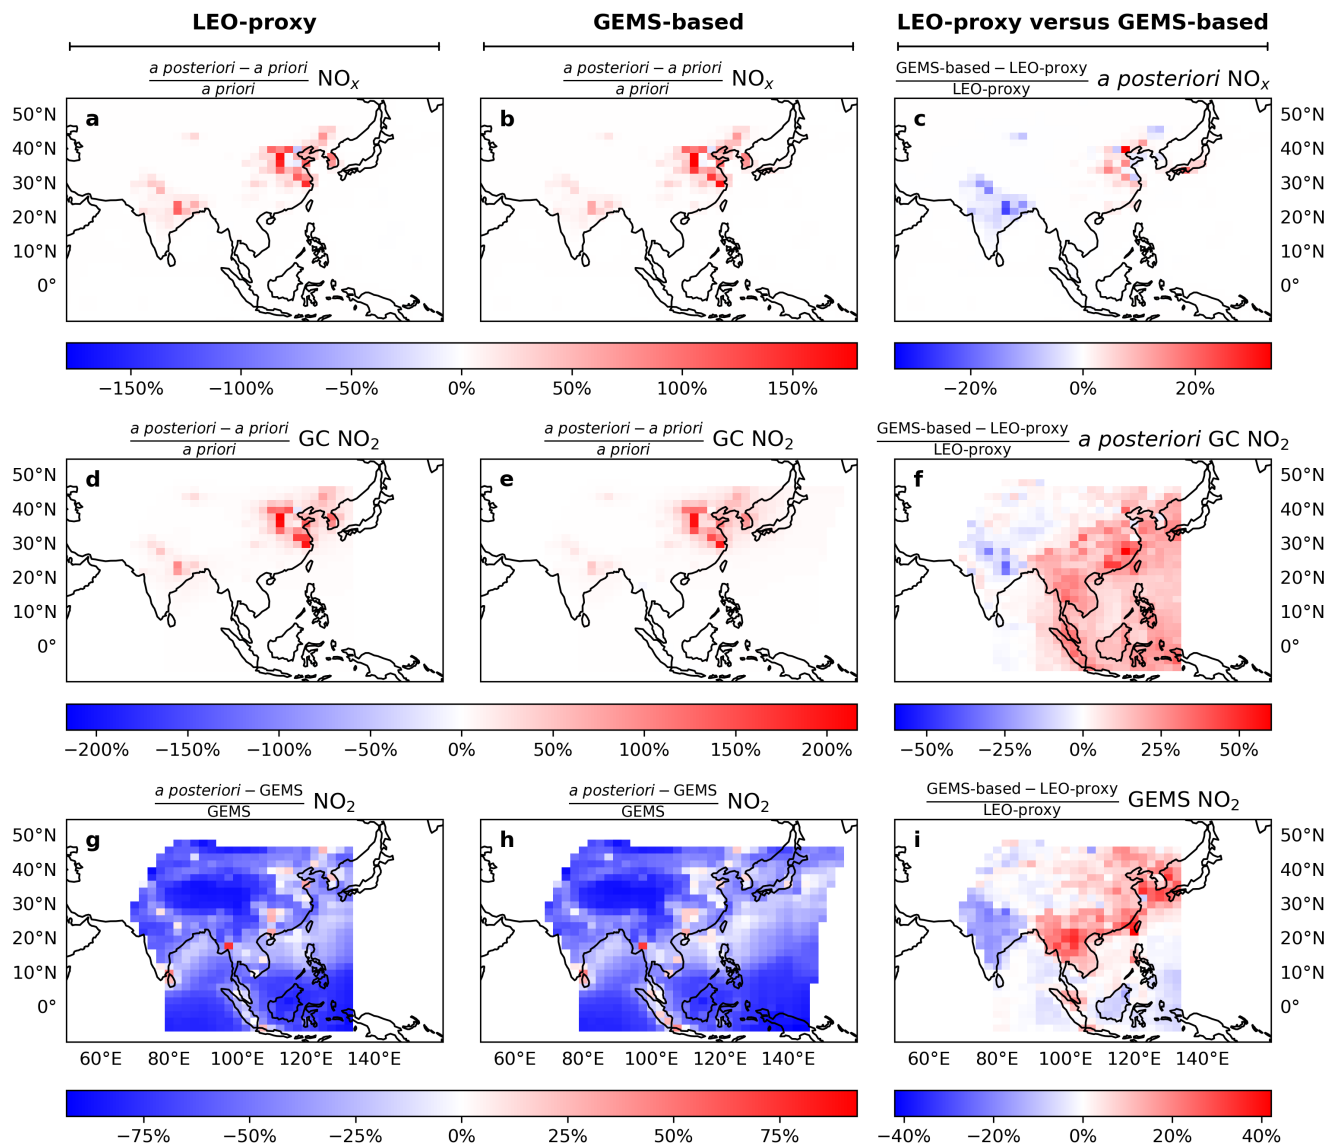

**Figure S12.** Results for April 2021 from the “LEO-proxy” and “GEMS-based” inversions, along with a comparison between them. Panels **a-i** specifically show percentage values corresponding to panels **a3**, **b3**, **c1**, **a9**, **b9**, **c3**, **a8**, **b8**, **c2** in Figure 4.

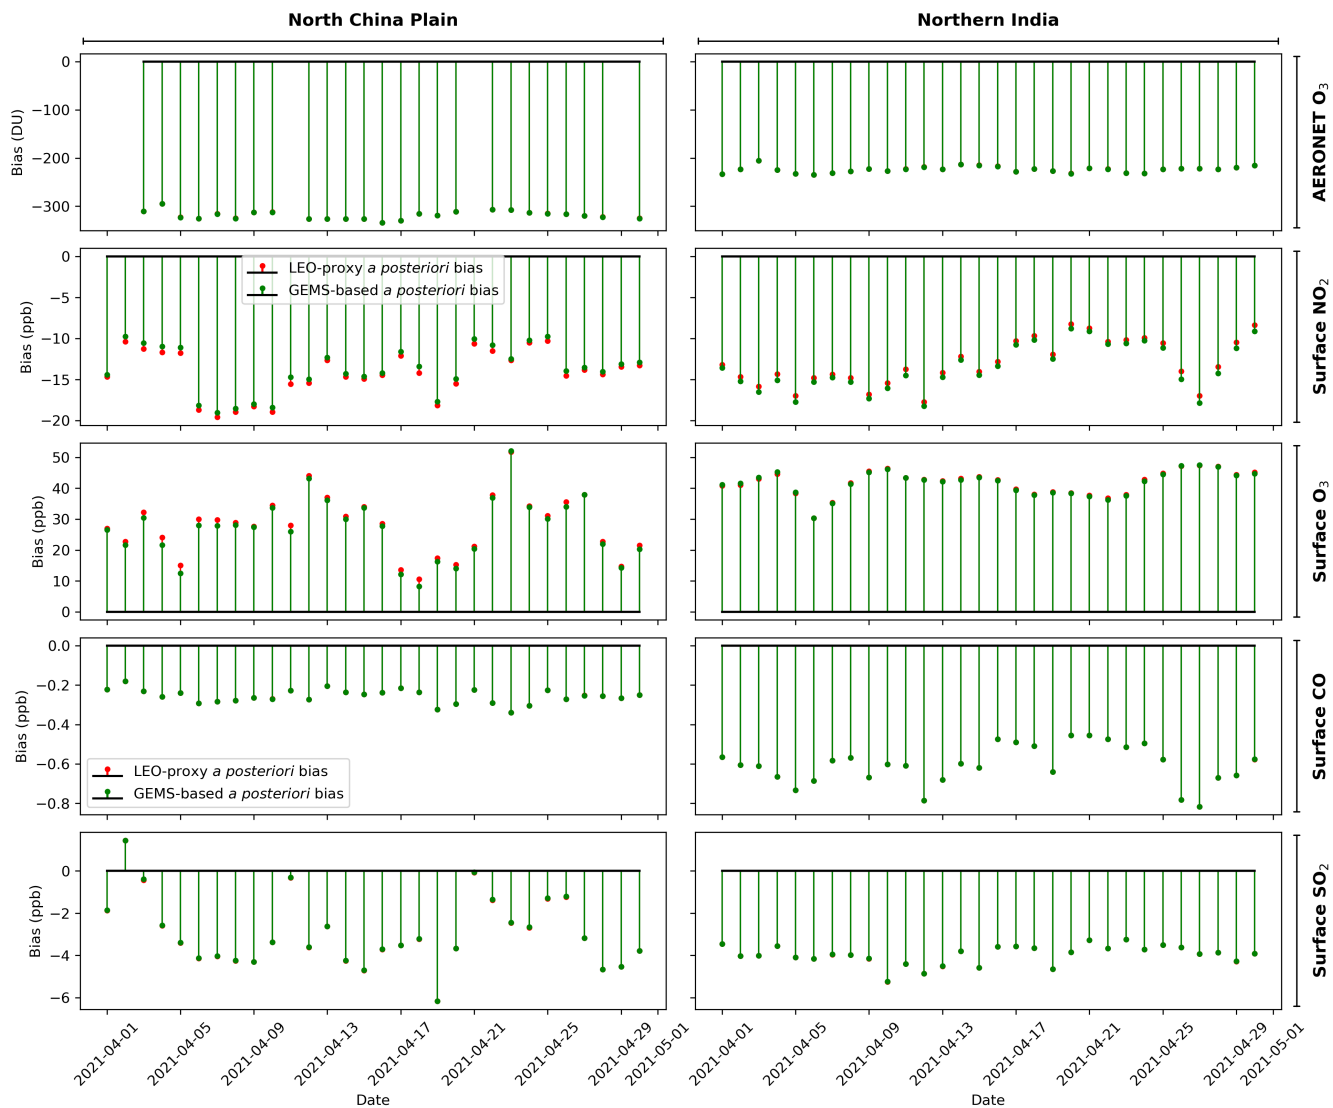

**Figure S13.** Stem plot of model–observation bias in columnar O<sub>3</sub>, surface NO<sub>2</sub>, surface O<sub>3</sub>, surface CO, and surface SO<sub>2</sub> over the North China Plain and Northern India subregions in April 2021.

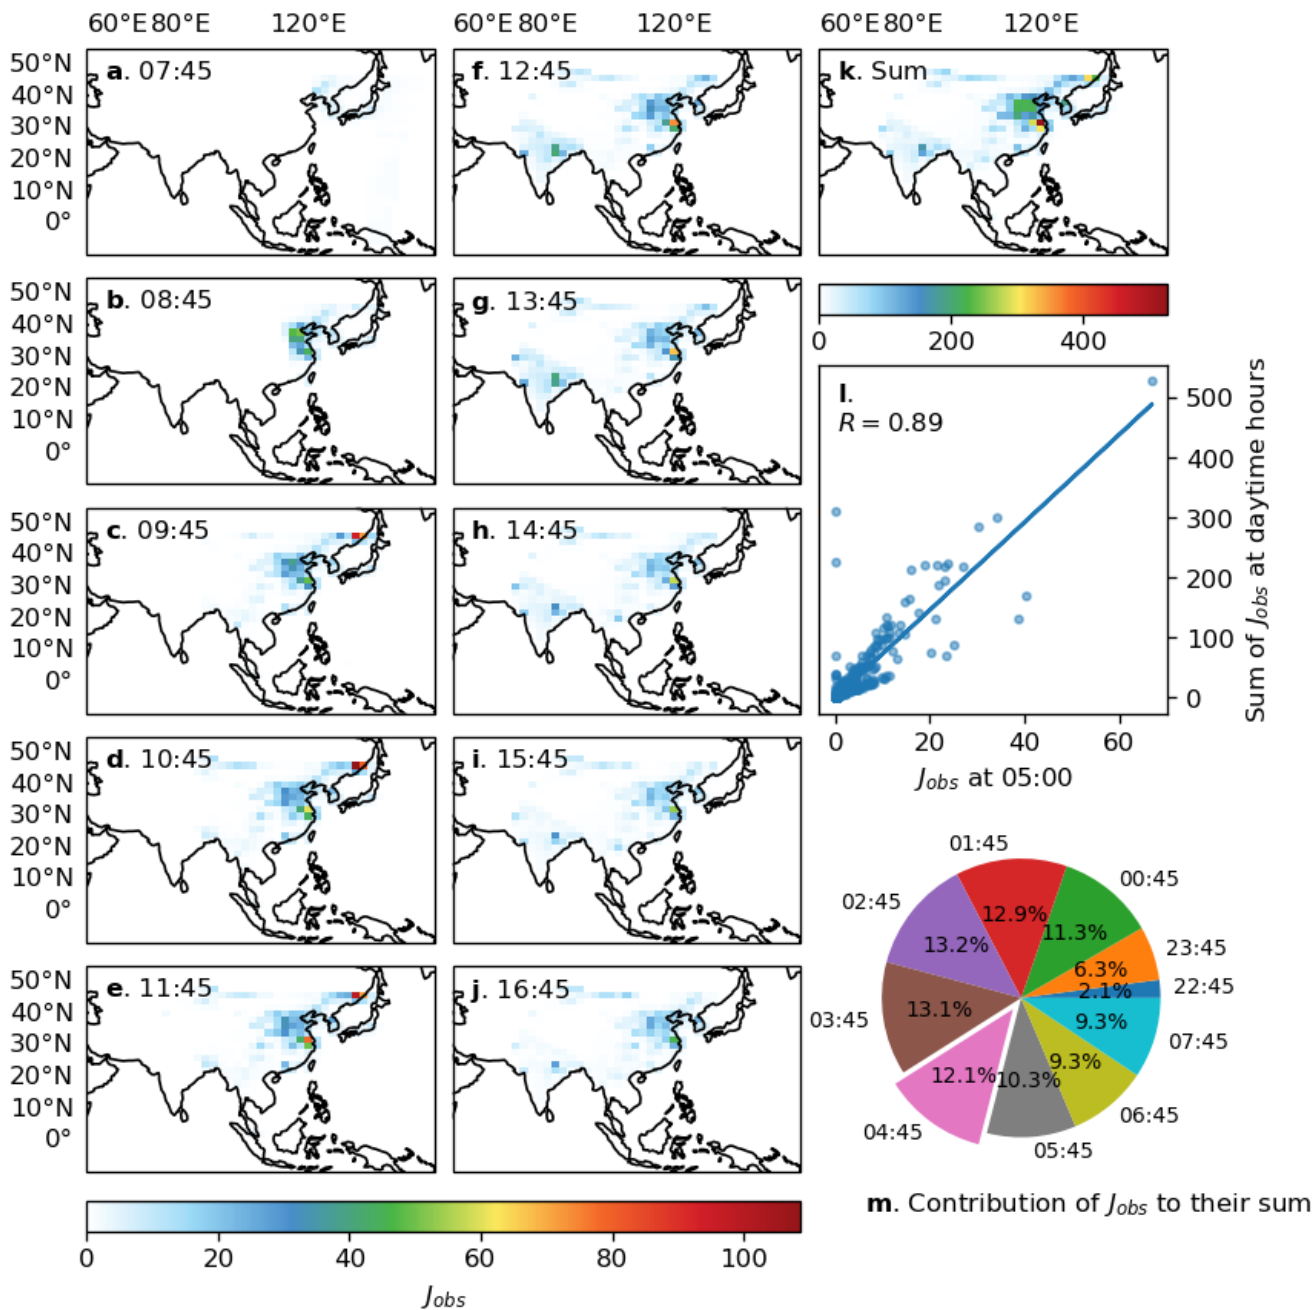

**Figure S14.** Geographical distributions of the observational part of the cost function ( $J_{obs}$ ) at 07:45 (a), 08:45 (b), 09:45 (c), 10:45 (d), 11:45 (e), 12:45 (f), 13:45 (g), 14:45 (h), 15:45 (i), and 16:45 (j) local time (Korea Standard Time) for April 2021. Panel k shows the sum of  $J_{obs}$  across all hours. Panel l shows the scatter plot between the sum of  $J_{obs}$  across all hours and the  $J_{obs}$  at 13:45 local time, with the Pearson correlation coefficient ( $R$ ) annotated. Panel m shows the contributions of  $J_{obs}$  at different hours to the total  $J_{obs}$  across all hours.
